# Supplementary material
Source: Springer Nature journal article supplement (https://www.springermedizin.de/resource/supplementary/12879_2008_832_MOESM5_ESM.pdf/9449886)
Supplement: MOESM5 [file 9449886]

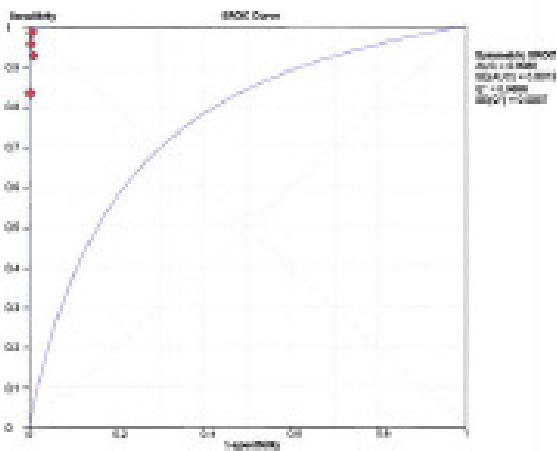

Analysis Options:  
 Add 0.5 to all cells of the matrix with zero  
 Plot: SROC  
 Summary: SROC curve (Red) using Mixed Model (Weighted regression) (Inverse Variance)  
 Defined: Identifying region: All (None) (All)

5a) Nitrate Reductase Assay

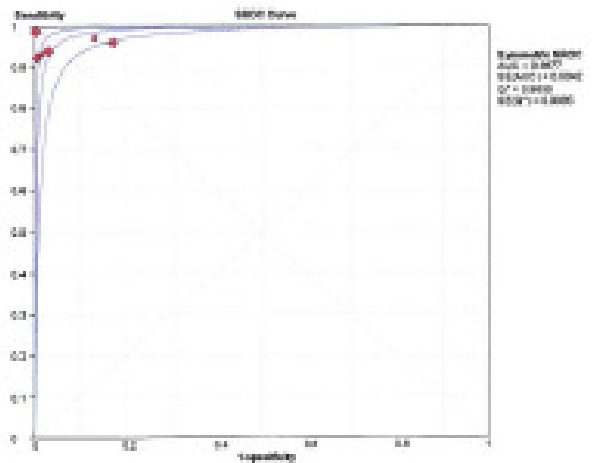

Analysis Options:  
 Add 0.5 to all cells of the matrix with zero  
 Plot: SROC  
 Summary: SROC curve (Red) using Mixed Model (Weighted regression) (Inverse Variance)  
 Defined: Identifying region: All (None) (All)

5b) MODS

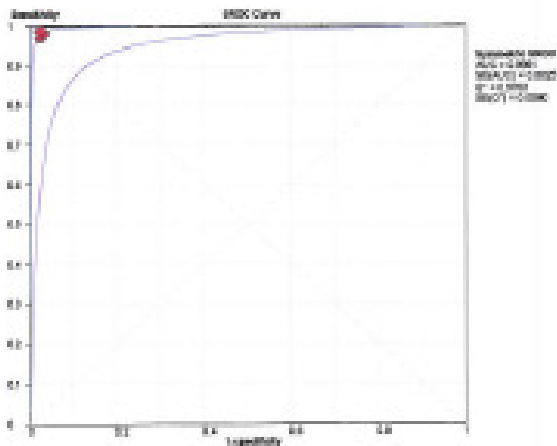

Analysis Options:  
 Add 0.5 to all cells of the matrix with zero  
 Plot: SROC  
 Summary: SROC curve (Red) using Mixed Model (Weighted regression) (Inverse Variance)  
 Defined: Identifying region: All (None) (All)

5c) Genotype<sup>®</sup> MTBDR

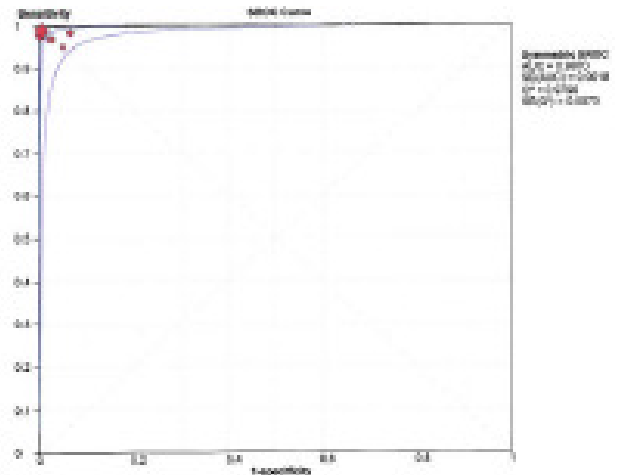

Analysis Options:  
 Add 0.5 to all cells of the matrix with zero  
 Plot: SROC  
 Summary: SROC curve (Red) using Mixed Model (Weighted regression) (Inverse Variance)  
 Defined: Identifying region: All (None) (All)

5d) Genotype<sup>®</sup> MTBDRplus
